# Supplementary material
Source: publisher figshare collection journal article supplement (https://acs.figshare.com/ndownloader/files/4761211)
Supplement: Supplementary file 1 [file 4761211]

data_block_1
_audit_creation_date         ''
_audit_creation_method       ''


_cell_length_a              8.2630
_cell_length_b              8.1950
_cell_length_c              3.9670
_cell_angle_alpha          90.05
_cell_angle_beta           89.99
_cell_angle_gamma          90.01


_symmetry_space_group_name_H-M   'P 1'
_symmetry_Int_Tables_number       1


loop_
_atom_site_label
_atom_site_fract_x
_atom_site_fract_y
_atom_site_fract_z
 H    0.9015    1.0426    1.1414
 H    0.9463    0.9118    0.8571
 H    0.2792    0.2264    0.3040
 H    0.4249    0.3438    0.2332
 H    0.3510    0.5807    0.7683
 H    0.2282    0.7204    0.6852
 H    0.5750    0.8436    0.0151
 H    0.7209    0.7260   -0.0542
 H    0.8503    0.4191    0.9829
 H    0.7275    0.2794    1.0653
 H    0.0539    0.4115    0.3945
 H    0.0987    0.5421    0.1104
 H    0.6493    0.0806    0.4810
 H    0.7715    0.2207    0.5647
 H    0.2722    0.7790    0.1845
 H    0.1500    0.9192    0.2677
 H    0.5991    0.4575    0.6413
 H    0.5542    0.5886    0.3580
 H    0.9250    0.6562    0.5165
 H    0.7797    0.7743    0.4462
 H    0.2205    0.2747    0.8046
 H    0.0748    0.1567    0.7351
 H    0.4011   -0.0432    0.6073
 H    0.4458    0.0879    0.8911
 O    0.9915    1.0012    0.9985
 O    0.3597    0.2555    0.1268
 O    0.2566    0.6399    0.8649
 O    0.6401    0.7554    0.1225
 O    0.7559    0.3600    0.8858
 O    0.0089    0.5007    0.2528
 O    0.7433    0.1402    0.3844
 O    0.2441    0.8597    0.3645
 O    0.5092    0.4993    0.4994
 O    0.8603    0.7450    0.6231
 O    0.1395    0.2453    0.6282
 O    0.4910   -0.0014    0.7497
